# Supplementary material for: Synthesis and characterization of the cyanobenzene-ethylenedithio-TTF donor
Source: publisher site journal article supplement (doi:10.3762/bjoc.11.106), 2015-06-03
Supplement: Additional file 1 [file 1860-5397-11-106-S1.pdf]

## Supporting Information

for

# Synthesis and characterization of the cyanobenzene-ethylenedithio-TTF donor

Sandrina Oliveira, Dulce Belo, Isabel C. Santos, Sandra Rabaça\* and Manuel Almeida\*

Address: C<sup>2</sup>TN, Instituto Superior Técnico, Universidade de Lisboa, Estrada Nacional 10,  
P-2695-066 Bobadela LRS, Portugal

Email: Sandra Rabaça\* - sandrar@ctn.ist.utl.pt;

Manuel Almeida\* - malmeida@ctn.ist.utl.pt

\*Corresponding author

**NMR (<sup>1</sup>H and <sup>13</sup>C), infrared spectra, UV–vis absorption spectra and  
short contact list of CNB-EDT-TTF**

# NMR spectra ( $^1\text{H}$ and $^{13}\text{C}$ ) of CNB-EDT-TTF

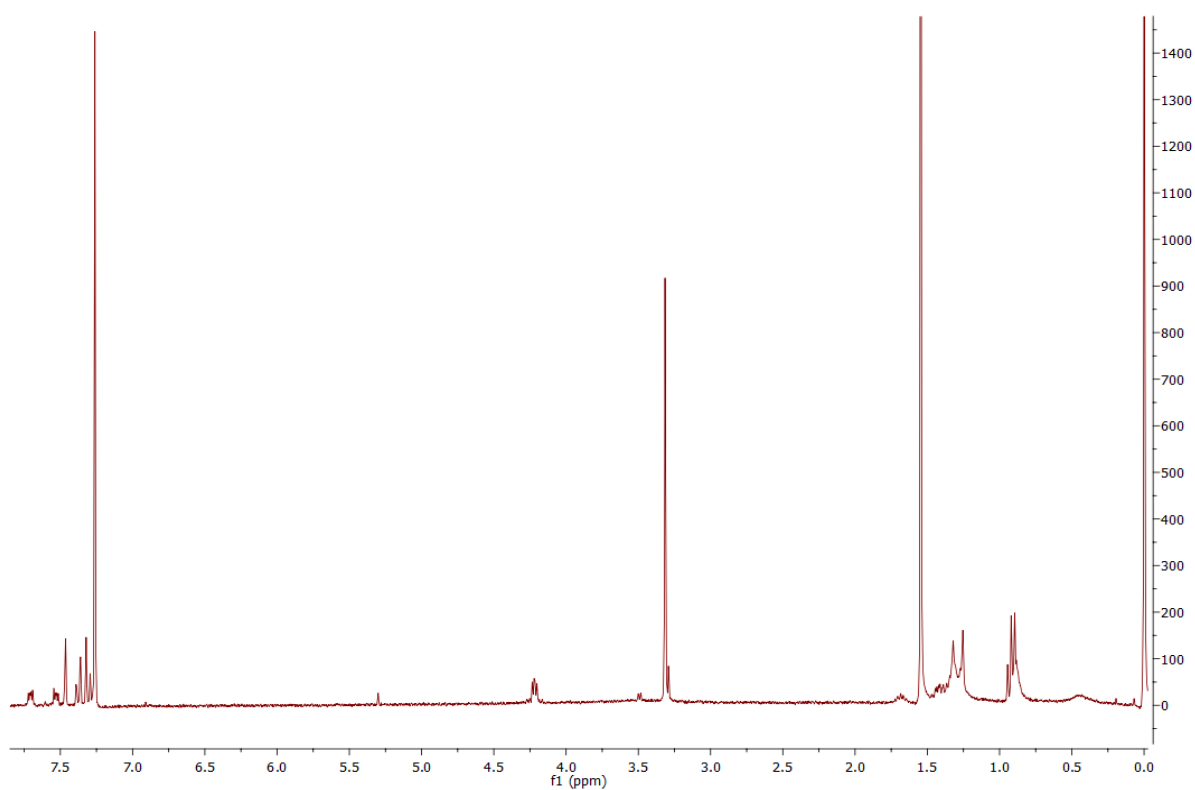

Figure S1:  $^1\text{H}$  NMR spectra of compound **3**.

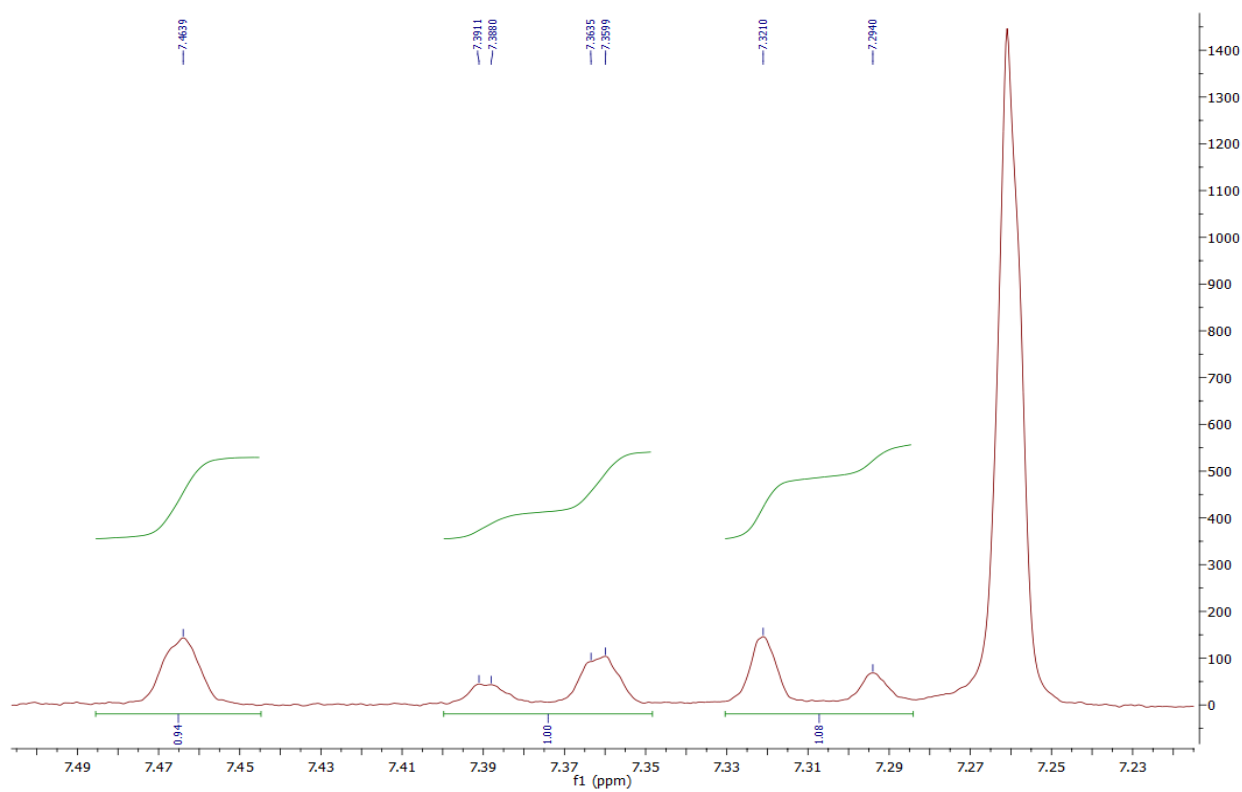

Figure S2: Zoom between 7.5 and 7.2 ppm.

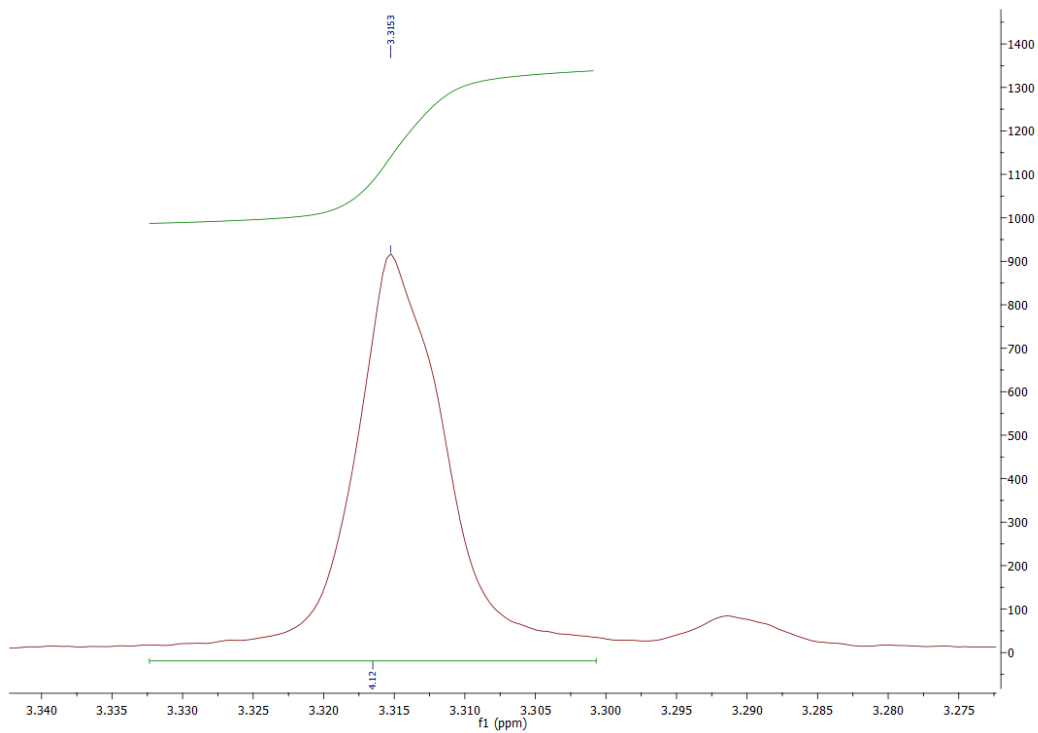

Figure S3: Zoom between 3.34 and 3.27 ppm.

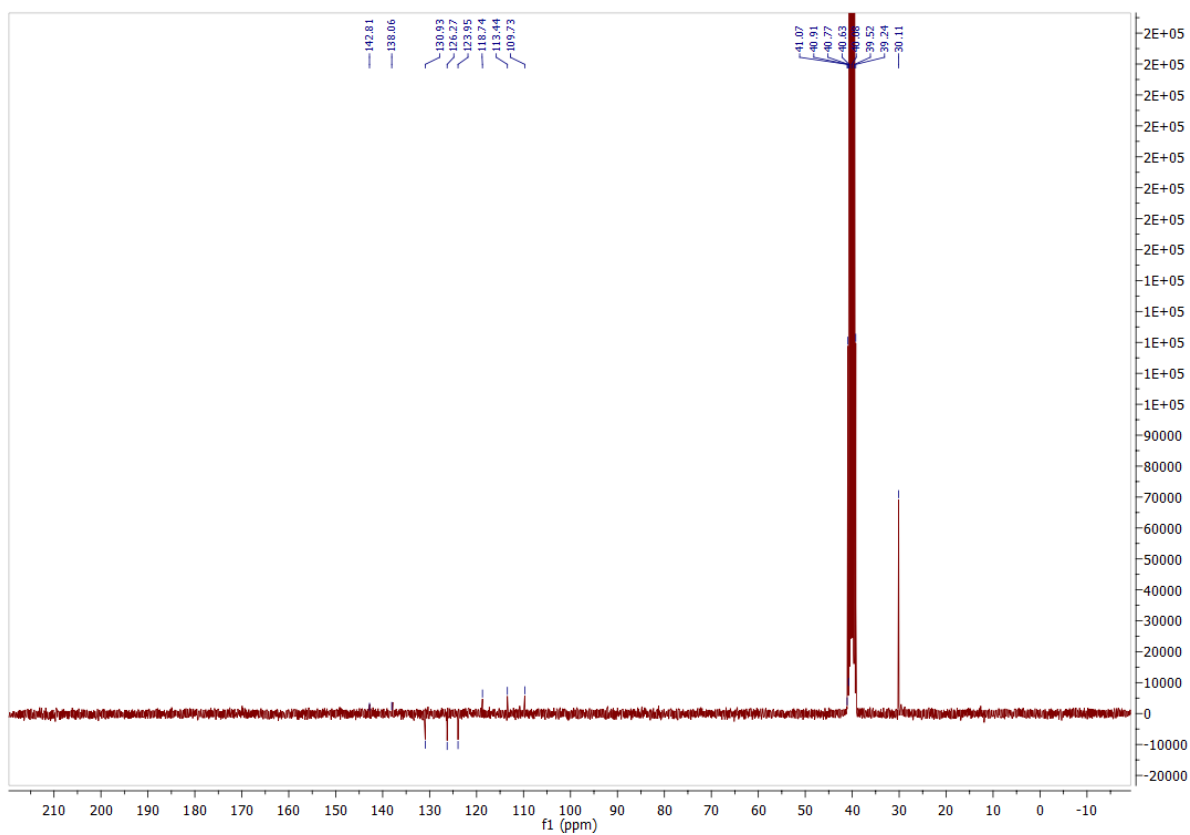

Figure S4:  $^{13}\text{C}$  NMR spectra APT of compound **3**. APT spectra is presented “upside-down” with CH and  $\text{CH}_3$  peaks “down” and quaternary and  $\text{CH}_2$  peaks “up”.

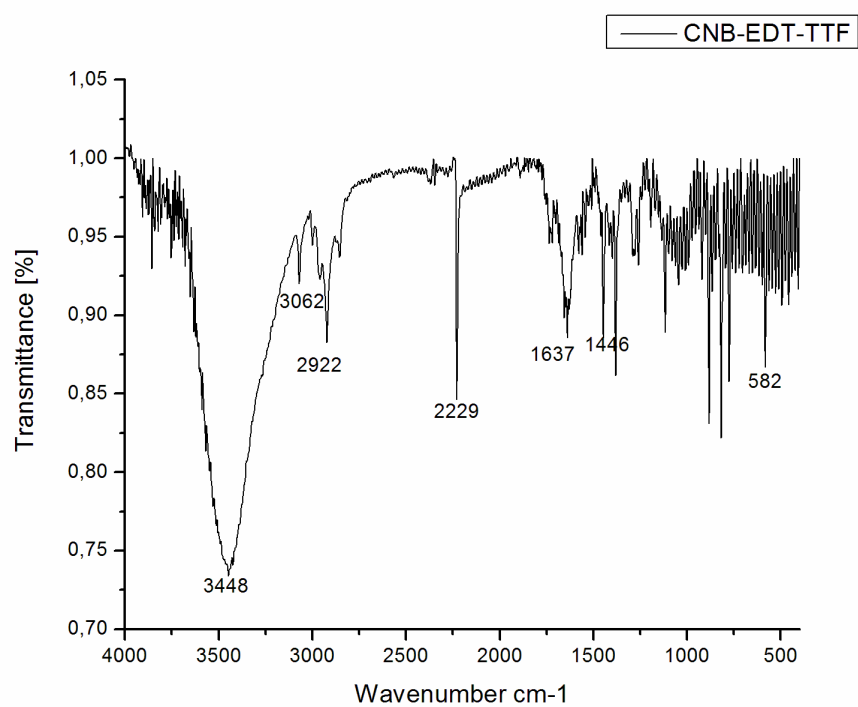

Figure S5: Infrared spectra of compound **3**.

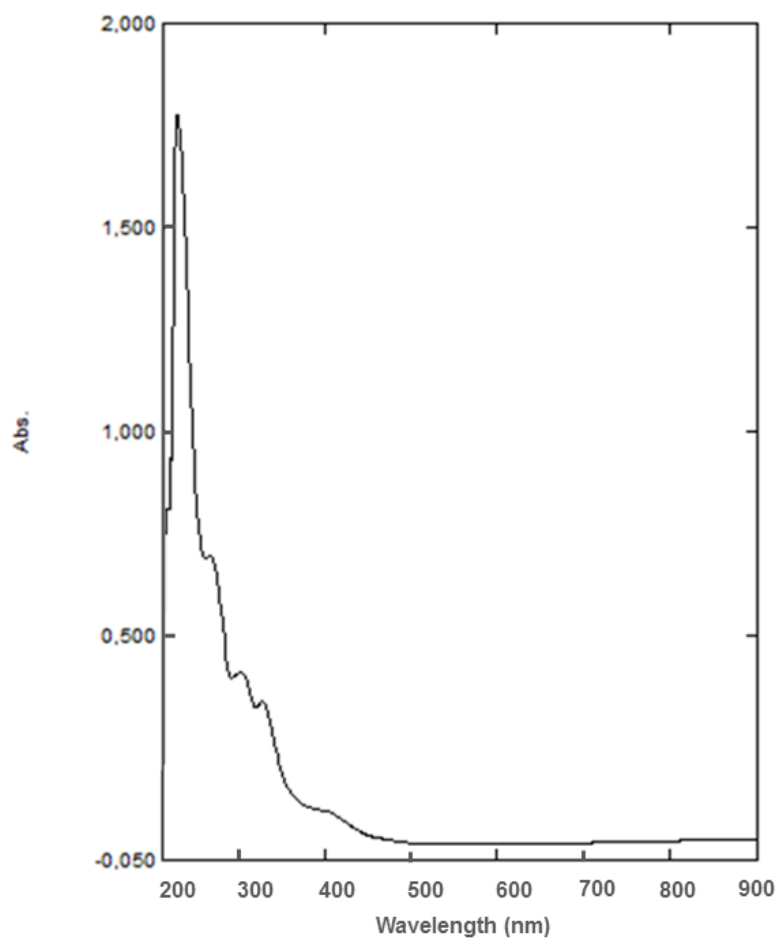

Figure S6: UV-vis absorption spectra in DCM of compound **3**.

Table S1: Short Contact list of compound **3**

| Short contact | Symmetry operation      | Length (Å) | Length- $\Sigma$ VdW (Å) |
|---------------|-------------------------|------------|--------------------------|
| S1...H1B      | $x, -1+y, z$            | 2.751      | -0.249                   |
| H2B...S4      | $x, -1+y, z$            | 2.824      | -0.176                   |
| S4...H2B      | $x, 1+y, z$             | 2.824      | -0.176                   |
| H1B...S1      | $x, 1+y, z$             | 2.751      | -0.249                   |
| S2...S3       | $1/2-x, -1/2+y, 1/2-z$  | 3.596      | -0.004                   |
| H9...S2       | $1/2-x, -1/2+y, 1/2-z$  | 2.911      | -0.089                   |
| S2...H9       | $1/2-x, 1/2+y, 1/2-z$   | 2.911      | -0.089                   |
| S3...S2       | $1/2-x, 1/2+y, 1/2-z$   | 3.596      | -0.004                   |
| S5...H10      | $1.5-x, -1/2+y, 1/2-z$  | 2.956      | -0.044                   |
| S6...H10      | $1.5-x, -1/2+y, 1/2-z$  | 2.980      | -0.020                   |
| H10...S5      | $1.5-x, 1/2+y, 1/2-z$   | 2.956      | -0.044                   |
| H10...S6      | $1.5-x, 1/2+y, 1/2-z$   | 2.980      | -0.020                   |
| H1A...N1      | $-1/2+x, 1/2-y, -1/2+z$ | 2.590      | -0.160                   |
| C1...N1       | $-1/2+x, 1.5-y, -1/2+z$ | 3.231      | -0.019                   |
| N1...H1A      | $1/2+x, 1/2-y, 1/2+z$   | 2.590      | -0.160                   |
| N1...C1       | $1/2+x, 1.5-y, 1/2+z$   | 3.231      | -0.019                   |
